# Supplementary material
Source: publisher figshare collection journal article supplement (https://acs.figshare.com/ndownloader/files/22300425)
Supplement: Supplementary file 1 [file 22300425]

## **Supporting Information**

# Effect of Surface States and Breakdown of the Schottky-Mott Limit of Graphene/Silicon van der Waals Heterostructure

Nam Hoang Vu,<sup>\*a,b,c</sup> Hieu Van Le,<sup>a,b</sup> Thang Bach Phan,<sup>c</sup> Toan The Nguyen,<sup>d</sup> Nam Thoai,<sup>b,e</sup>  
and Thi Minh Cao,<sup>f</sup>

<sup>a</sup>Faculty of Materials Science and Technology, University of Science, Ho Chi Minh City  
700000, Vietnam

<sup>b</sup>Vietnam National University, Ho Chi Minh City 700000, Vietnam

<sup>c</sup>Center for Innovative Materials and Architectures, Vietnam National University, Ho Chi  
Minh City 700000, Vietnam

<sup>d</sup>VNU Key Laboratory on Multiscale Simulation of Complex Systems, Faculty of Physics,  
University of Science, Vietnam National University-Hanoi, Hanoi 10000, Vietnam

<sup>e</sup>High-Performance Computing Lab, Faculty of Computer Science and Engineering, Ho Chi  
Minh City University of Technology (HCMUT), Ho Chi Minh City 700000, Vietnam

<sup>f</sup>Ho Chi Minh City University of Technology (HUTECH), Ho Chi Minh City 700000,  
Vietnam

<sup>\*</sup>*E-mail*: vhnam@hcmus.edu.vn

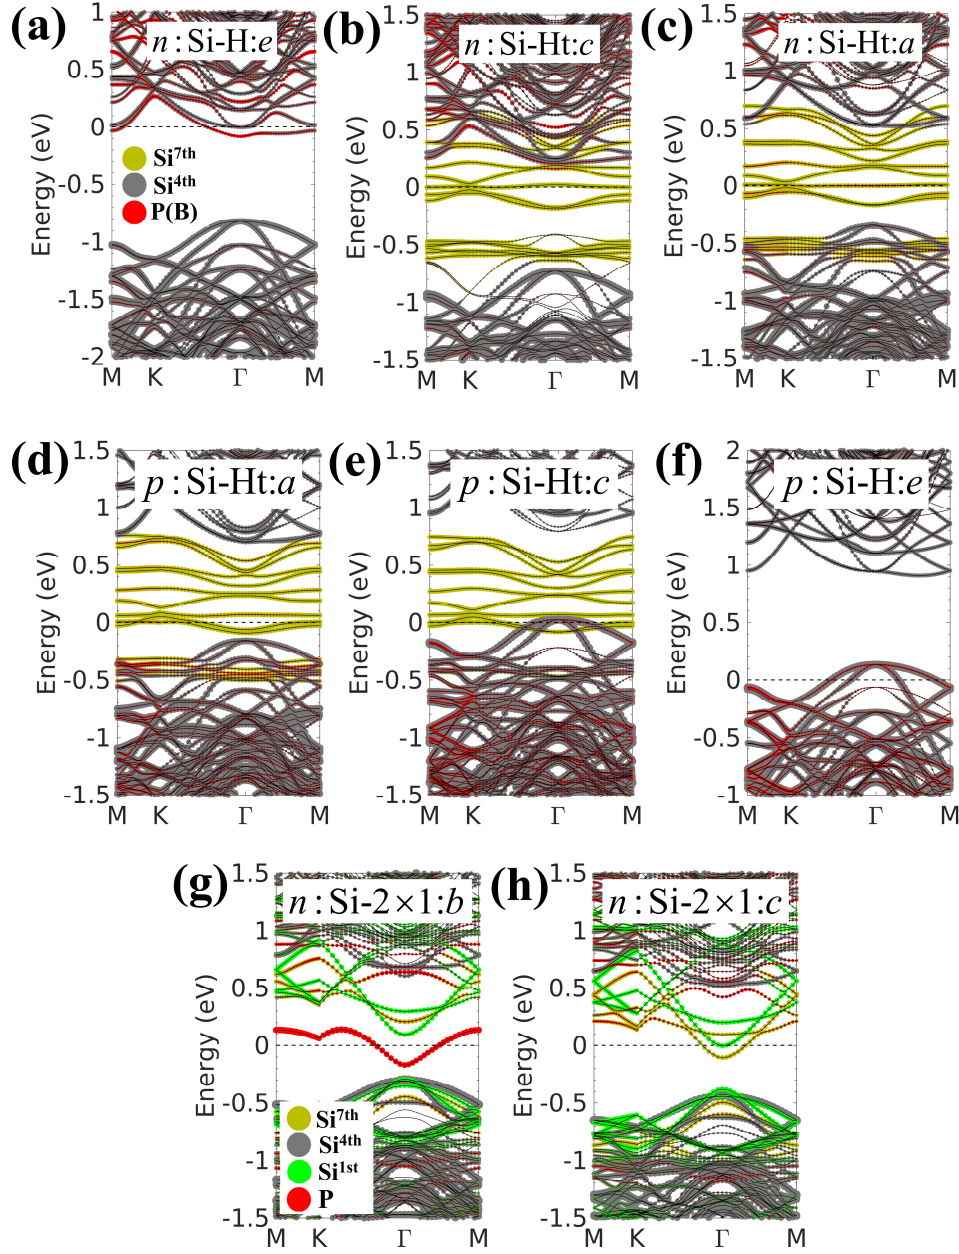

**Figure S1.** Projected band structures of the Si substrates for (a)  $p$ :Si-H: $e$ , (b)  $p$ :Si-Ht: $c$ , (c)  $p$ :Si-Ht: $a$ , (d)  $n$ :Si-Ht: $a$ , (e)  $n$ :Si-Ht: $c$  and (f)  $n$ :Si-H: $e$ ; for (g)  $n$ :Si-2 $\times$ 1: $b$ , and (h)  $n$ :Si-2 $\times$ 1: $c$ . The yellow, gray, green, and red dots represent the projection of Si<sup>7th</sup>, Si<sup>4th</sup>, Si<sup>1st</sup> layers and P(B) dopant atom, respectively. The projection weight is represented by the dot size. The projection weight of P(B) dopant atom is multiplied by a factor of 5 for better visualization. For the Si-2 $\times$ 1 substrates (figure (g) and (h)), the Si<sup>1st</sup> layer consists of the  $\pi_t$  and  $\pi_t^*$  bands; and the Si<sup>7th</sup> layer consists of the  $\pi_b$  and  $\pi_b^*$  bands. The Fermi level is set at  $E = 0$  eV.

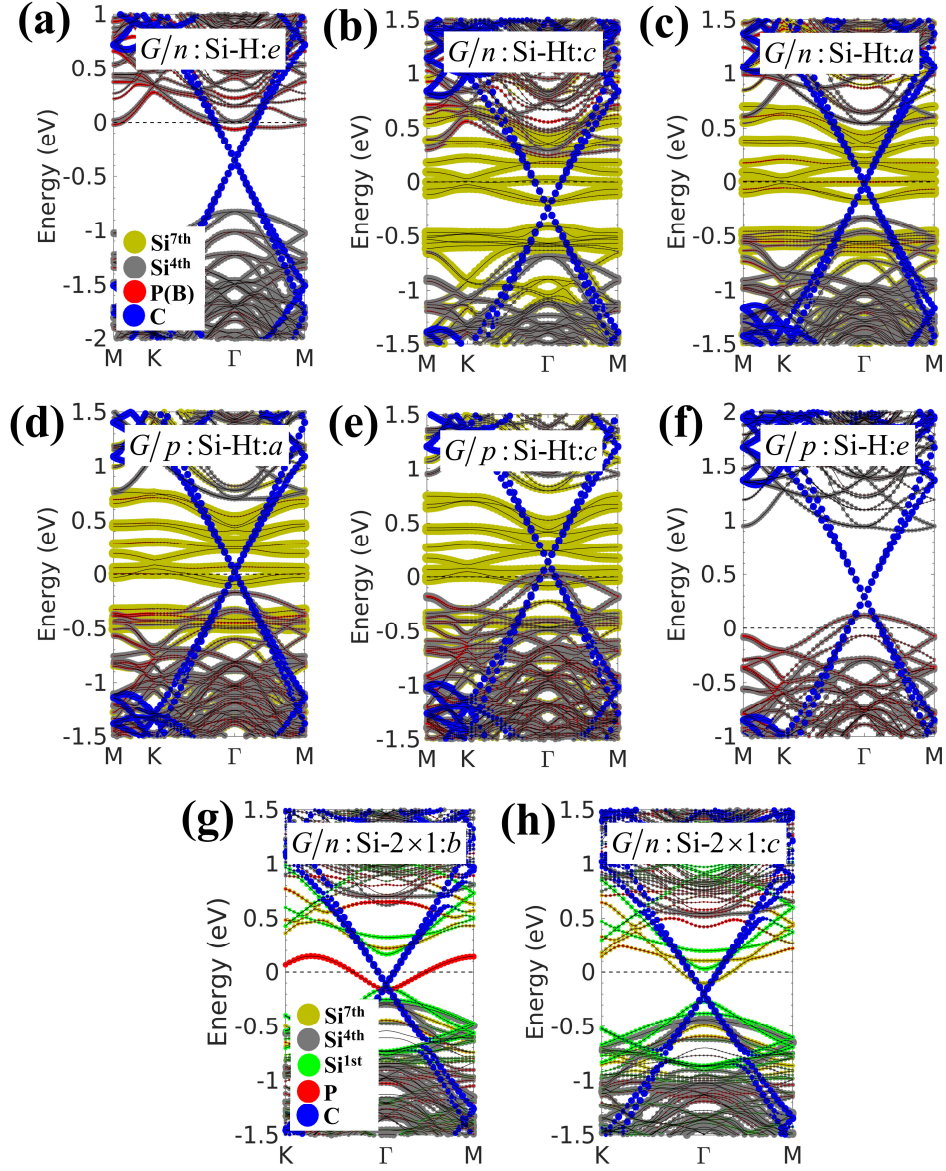

**Figure S2.** Projected band structures of the G/Si interfaces for (a) G/p:Si-H:e, (b) G/p:Si-Ht:c, (c) G/p:Si-Ht:a, (d) G/n:Si-Ht:a, (e) G/n:Si-Ht:c and (f) G/n:Si-H:e; for (g) G/n:Si-2 $\times$ 1:b, and (h) G/n:Si-2 $\times$ 1:c. The yellow, gray, green, red, and blue dots represent the projection of Si<sup>7th</sup>, Si<sup>4th</sup>, Si<sup>1st</sup> layers, P(B) dopant atom, and C atoms, respectively. The projection weight is represented by the dot size. The projection weight of P(B) dopant atom is multiplied by a factor of 5 for better visualization. For the G/Si-2 $\times$ 1 interfaces (figure (g) and (h)), the Si<sup>1st</sup> layer consists of the  $\pi_t$  and  $\pi_t^*$  bands; and the Si<sup>7th</sup> layer consists of the  $\pi_b$  and  $\pi_b^*$  bands. The Fermi level is set at  $E = 0$  eV.

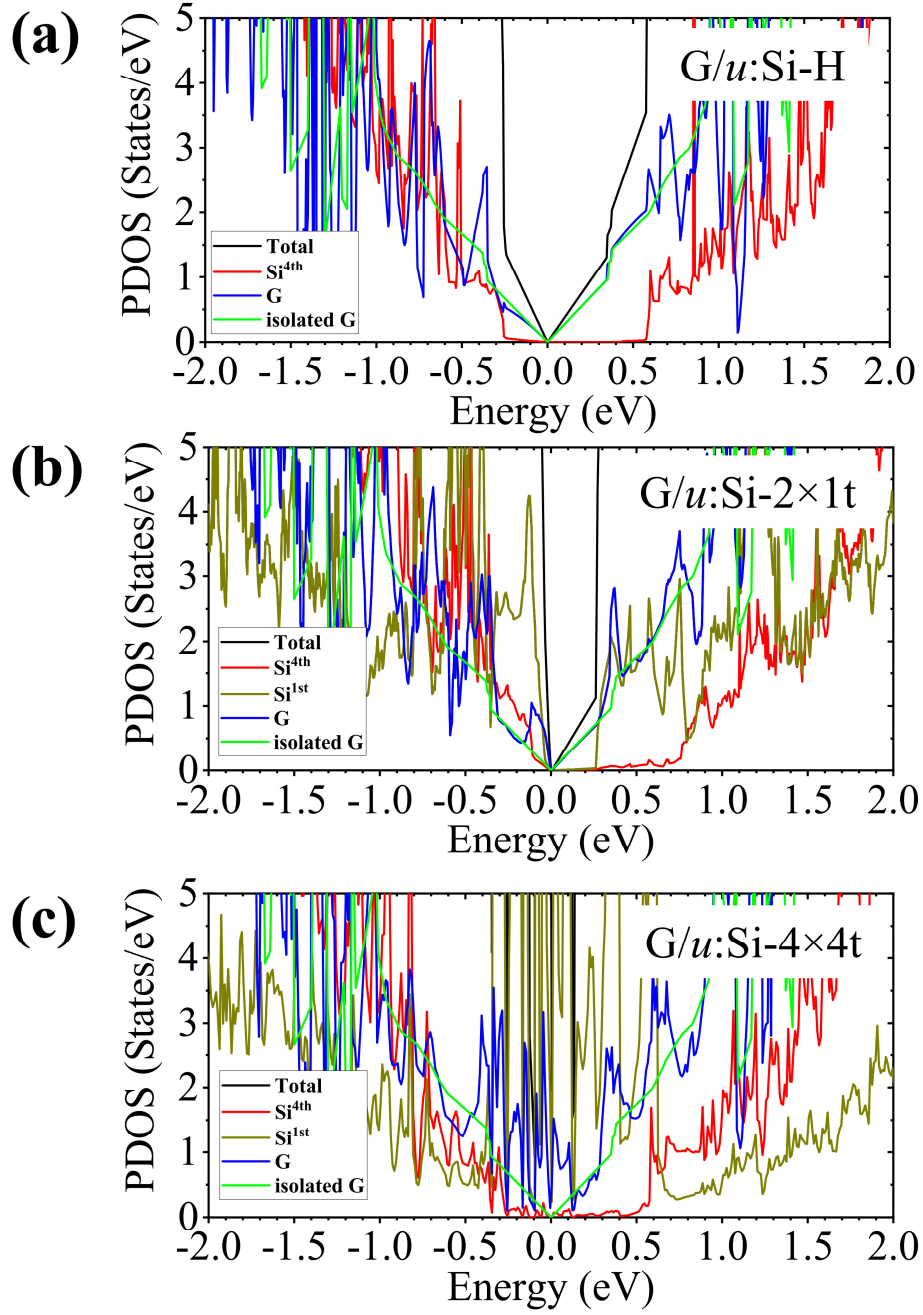

**Figure S3.** Partial density of states (PDOS) of the G/Si interfaces for (a) G/u:Si-H, (b) G/u:Si-2 $\times$ 1t and (c) G/u:Si-4 $\times$ 4t. The Fermi level is set at  $E = 0$  eV. Black lines present total PDOS. Red, yellow, blue, and green lines present PDOS of the  $\text{Si}^{4\text{th}}$  layer,  $\text{Si}^{1\text{st}}$  layer, graphene on the substrates, and isolated graphene, respectively.



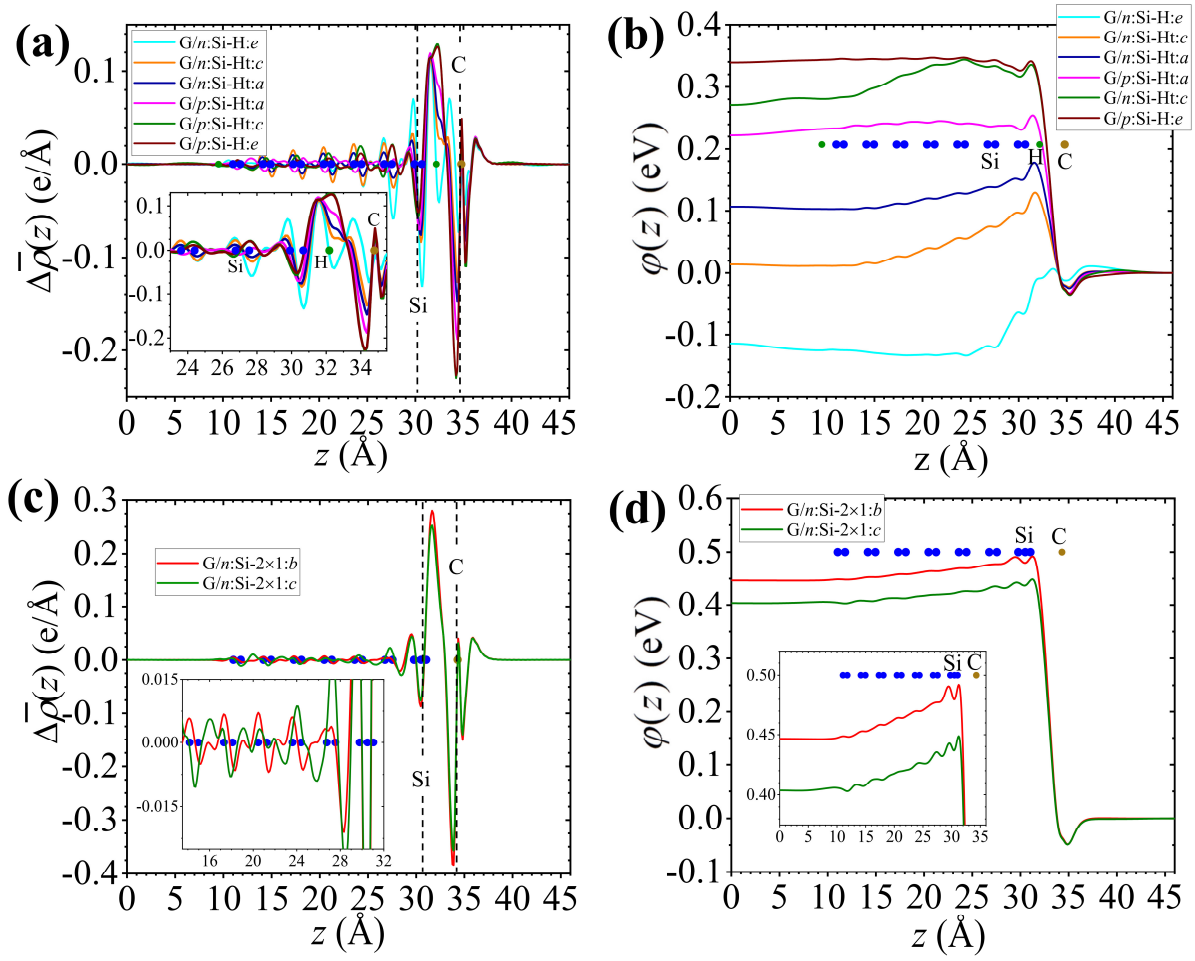

**Figure S4.** Plane averaged charge density difference,  $\Delta\bar{\rho}(z)$ , and interface-induced potential distribution,  $\phi(z)$ , along the vertical  $z$  direction normal to the interfaces, respectively, for (a) and (b) the G/Si-H(t) interfaces; (c) and (d) the G/Si-2×1 interfaces. The inset plot shows a zoomed-in view of the main plot.

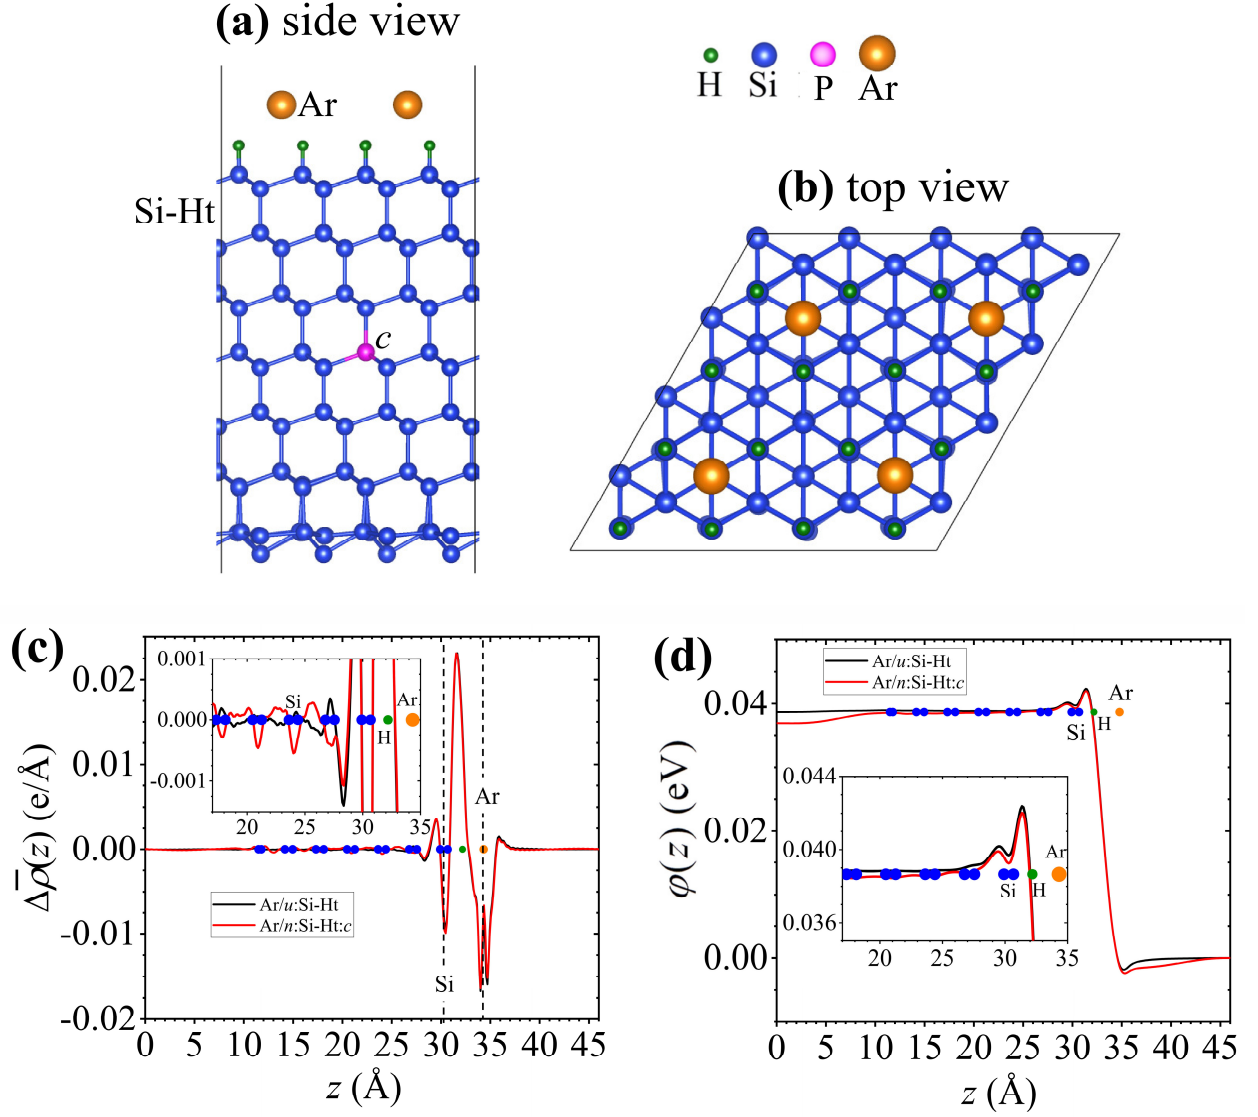

**Figure S5.** (a) Side view and (b) Top view of the Ar/(*u,n*):Si-Ht:(*c*) interfaces. The small green, middle blue and pink spheres are H, Si and P atoms, respectively. The large yellow ball is Ar atom. The P dopant atom is at *c* site of the Si-Ht substrate. (c) Plane averaged charge density difference,  $\Delta\bar{\rho}(z)$ , and (d) interface-induced potential distribution,  $\phi(z)$ , along the vertical *z* direction normal to the Ar/*u*:Si-Ht and Ar/*n*:Si-Ht:*c* interfaces. The inset plot shows a zoomed-in view of the main plot.

**Table S1.** Calculated DFT results based on LDA and PBE functionals for the G/Si interfaces.

Lattice mismatch,  $\delta = (a_{Si} - a_G)/a_{Si}$  (%), where  $a_{Si}$  and  $a_G$  are lattice constants of the Si substrate and isolated graphene, respectively; equilibrium interaction distance ( $d_{eq}$ ), and binding energy per C atom ( $E_b$ ) of the G/*u*:Si-2×1t and G/*u*:Si-4×4t interfaces.

| LDA                  |              |              |             |
|----------------------|--------------|--------------|-------------|
| Interfaces           | $\delta$ (%) | $d_{eq}$ (Å) | $E_b$ (meV) |
| G/ <i>u</i> :Si-2×1t | -0.132       | 3.221        | 16.9        |
| G/ <i>u</i> :Si-4×4t | -0.132       | 3.142        | 13.2        |
| PBE                  |              |              |             |
| G/ <i>u</i> :Si-2×1t | 0.237        | 3.922        | 1.0         |
| G/ <i>u</i> :Si-4×4t | 0.237        | 3.925        | 5.5         |

**Table S2.** Calculated values obtained using optB86b-vdW correction for the G/Si-H(t) and G/Si-2×1 interfaces. Electron affinity of Si substrate ( $\chi_{Si}$ ), work function of top Si surface ( $W_{Si}$ ), work function of graphene-covered Si surface ( $W_{G/Si}$ ), electron Schottky barrier height ( $\Phi_n^* = E_c - E_F$ ), where  $E_c$  and  $E_F$  are the conduction band minimum energy of the substrate and the Fermi level, respectively; Fermi level shift in graphene ( $\Delta E_F$ ), and interfacial potential step  $\Delta V$ .

| Interfaces           | $\chi_{Si}$<br>(eV) | $W_{Si}$<br>(eV) | $W_{G/Si}$<br>(eV) | $\Phi_n^*$<br>(eV) | $\Delta E_F$<br>(eV) | $\Delta V$<br>(eV) |
|----------------------|---------------------|------------------|--------------------|--------------------|----------------------|--------------------|
| G/n:Si-Ht: <i>a</i>  | 3.983               | 4.51             | 4.40               | 0.54               | 0.014                | 0.15               |
| G/n:Si-Ht: <i>c</i>  | 3.971               | 4.20             | 4.18               | 0.24               | 0.237                | 0.10               |
| G/n:Si-H: <i>e</i>   | 4.005               | 3.94             | 4.07               | -0.05              | 0.352                | -0.07              |
| G/p:Si-H: <i>e</i>   | 4.155               | 5.07             | 4.71               | 0.91               | -0.295               | 0.33               |
| G/p:Si-Ht: <i>c</i>  | 4.062               | 4.90             | 4.55               | 0.86               | -0.138               | 0.32               |
| G/p:Si-Ht: <i>a</i>  | 4.045               | 4.75             | 4.44               | 0.70               | -0.020               | 0.23               |
| G/n:Si-2×1: <i>b</i> | 4.176               | 4.78             | 4.33               | 0.62               | 0.117                | 0.48               |
| G/n:Si-2×1: <i>c</i> | 4.179               | 4.69             | 4.25               | 0.51               | 0.199                | 0.44               |
